# Supplementary material
Source: HighWire-hosted journal article supplement (https://bmjopenquality.bmj.com/highwire/filestream/136118/field_highwire_adjunct_files/0/ds2216.xls)
Supplement: ds2216.xls [file ds2216.xls]

## Sheet: Sheet1
	Paper Discharge Summaries	Electronic Discharge Summaries
Correct consultant	82.6% (of 86 patients)	90% (of 80 patients)
Correct diagnosis	80.7% (of 86 patients)	85% (of 80 patients)
Correct procedure	81.7% (of 60 patients)	88.9% (of 72 patients)
Complications/concurrent illnesses documented	46.4% (of 13 patients)	61.9% (of 21 patients)
Correct discharge medications	60.5% (of 86 patients)	88.75% (of 80 patients)
Documentation of medication changes	25.8% (of 31 patients)	48.38% (of 32 patients)
Pharmacological VTE prophylaxis correctly prescribed	76% (70/92)	99% (116/117)
Correct co-morbidities documented (from mandatory list)	43% (19/44)	Awaiting review
